# Supplementary material for: Predicting Prognosis of Breast Cancer Patients with Brain Metastases in the BMBC Registry—Comparison of Three Different GPA Prognostic Scores
Source: PubMed Central journal article supplement (PMC7922206; doi:10.3390/cancers13040844), 2021-02-17
Supplement: cancers-13-00844-s001.pdf [file cancers-13-00844-s001.pdf]

Article

# Predicting Prognosis of Breast Cancer Patients with Brain Metastases in the BMBC Registry – Comparison of Three Different GPA Prognostic Scores

## Supplementary Materials

**Table S1.** Multivariate Cox regression analysis of the time from BM to death.

| Parameter                                  | Category              | Hazard Ratio | 95% CI         | p-Value |
|--------------------------------------------|-----------------------|--------------|----------------|---------|
| Biological subtype (acc. to Sperduto 2012) | TNBC                  |              |                | <0.001  |
|                                            | Luminal A (HR+/HER2-) | 0.721        | (0.592, 0.878) | 0.001   |
|                                            | Luminal B (HR+/HER2+) | 0.433        | (0.348, 0.539) | <0.001  |
|                                            | HER2 (HR-/HER2+)      | 0.451        | (0.358, 0.570) | <0.001  |
| Age at diagnosis of BM, binary             | <60                   |              |                |         |
|                                            | ≥60                   | 1.44         | (1.24, 1.68)   | <0.001  |
| KPS                                        | 100%                  |              |                | <0.001  |
|                                            | 80-90%                | 1.06         | (0.833, 1.35)  | 0.636   |
|                                            | 60-70%                | 1.85         | (1.44, 2.38)   | <0.001  |
|                                            | 10-50%                | 2.86         | (2.12, 3.86)   | <0.001  |
| Number of BM                               | 1                     |              |                | <0.001  |
|                                            | 2-3                   | 1.39         | (1.13, 1.72)   | 0.002   |
|                                            | ≥4                    | 1.68         | (1.38, 2.03)   | <0.001  |
| ECM at BM diagnosis                        | no                    |              |                |         |
|                                            | yes                   | 1.23         | (.981, 1.55)   | 0.072   |

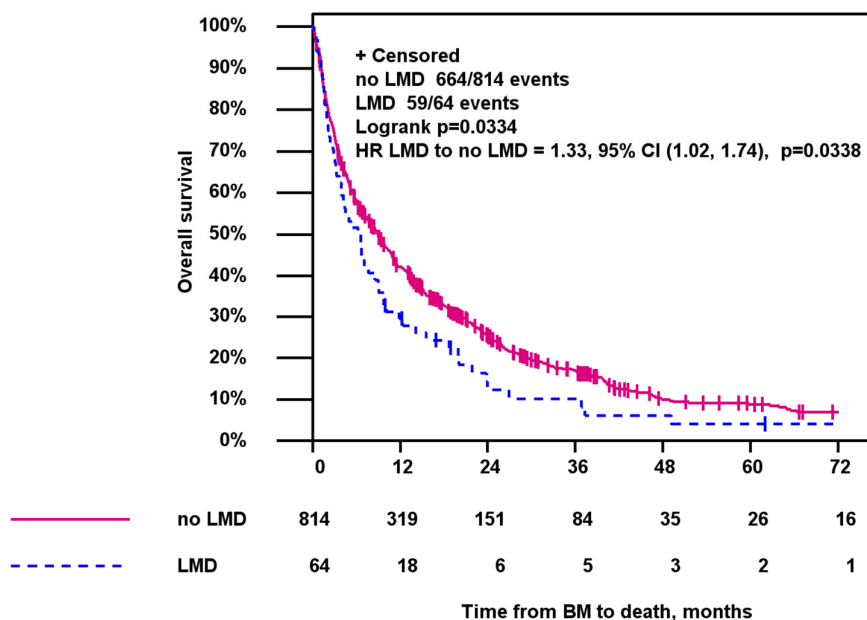

**Figure S1.** Overall Survival for Leptomeningeal disease and solid BM vs. only solid BM.

**Table S2.** Progression free Survival according to Breast Cancer subtype.

| Survival | Subtype               | Median (95% CI) |
|----------|-----------------------|-----------------|
| PFS      | TNBC                  | 4.3 (3.5, 5.1)  |
|          | Luminal A (HR+/HER2-) | 5.2 (4.2, 6.4)  |
|          | Luminal B (HR+/HER2+) | 11.4 (9.2,13.4) |
|          | HER2 (HR-/HER2+)      | 9.1 (7.7,11.0)  |

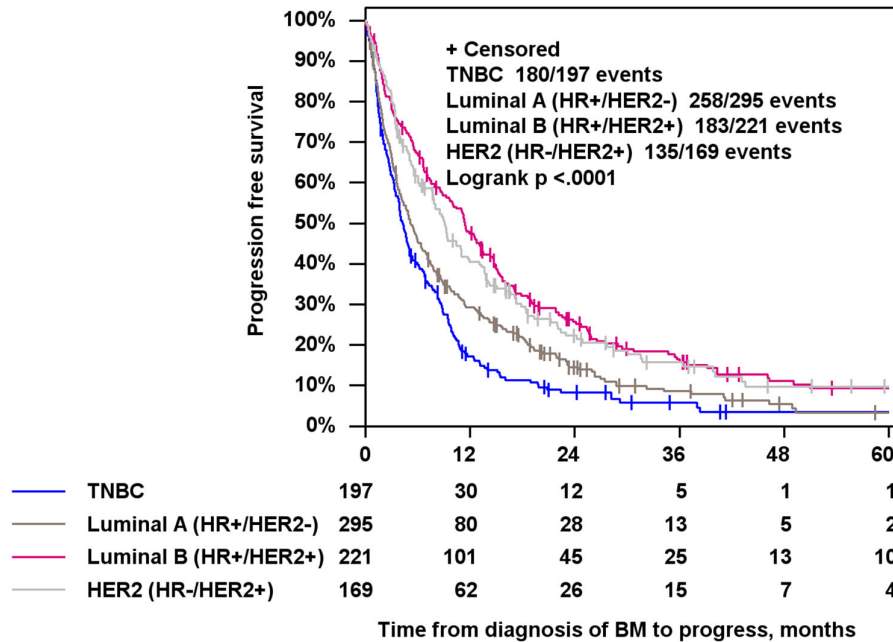

**Figure S2.** Time from first diagnosis of BM to progress.

**Table S3.** Distribution of the subtype (according to Sperduto 2012) in patients with meningeosis carcinomatosa (n = 252 of overall 2589 patients).

| Subtype According to Sperduto 2012 | N(%) (n =252) |
|------------------------------------|---------------|
| TNBC                               | 52 (23.74)    |
| Luminal A                          | 82 (37.44)    |
| Luminal B                          | 49 (22.37)    |
| HER2                               | 36 (16.44)    |
| Missing                            | 33            |

**Table S4.** Local treatment according to subtype (Sperduto 2012).

| Local Treatment | Subtype (Sperduto 2012) | Number (%) |
|-----------------|-------------------------|------------|
| Surgery only    | TNBC (HR-/HER2-)        | 4 ( 2.4)   |
|                 | Luminal A (HR+, HER2 -) | 14 (5.6)   |
|                 | Luminal B/HER2 enriched | 9 (4.6)    |

| (HR +, HER2 +)           |                                        |            |
|--------------------------|----------------------------------------|------------|
|                          | HER2 (HR-/HER2+)                       | 7 (4.6)    |
| Radiotherapy only        | TNBC (HR-/HER2-)                       | 120 (73.2) |
|                          | Luminal A (HR+, HER2 -)                | 186 (74.1) |
|                          | Luminal B/HER2 enriched (HR +, HER2 +) | 133 (68.2) |
|                          | HER2 (HR-/HER2+)                       | 105 (68.6) |
| Surgery and Radiotherapy | TNBC (HR-/HER2-)                       | 40 (24.4)  |
|                          | Luminal A (HR+, HER2 -)                | 51 (27.2)  |
|                          | Luminal B/HER2 enriched (HR +, HER2 +) | 53 (27.2)  |
|                          | HER2 (HR-/HER2+)                       | 41 (26.8)  |
| Missing                  | TNBC (HR-/HER2-)                       | 33         |
|                          | Luminal A (HR+, HER2 -)                | 41         |
|                          | Luminal B/HER2 enriched (HR +, HER2 +) | 26         |
|                          | HER2 (HR-/HER2+)                       | 16         |

**Table S5.** Distribution of BC treatment between different subtypes after the diagnosis of BM.

|                   | TNBC<br><i>n</i> = 81 N(%) | Luminal A<br>(HR+/HER2-)<br><i>n</i> = 151 N(%) | Luminal B<br>(HR+/HER2+)<br>N(%) <i>n</i> = 131 | HER2<br>(HR-/HER2+)<br><i>n</i> = 94 N(%) | Overall<br><i>n</i> = 457 * N(%) |
|-------------------|----------------------------|-------------------------------------------------|-------------------------------------------------|-------------------------------------------|----------------------------------|
| Chemotherapy      | 123 (76.9)                 | 143 (46.6)                                      | 118 (33.2)                                      | 82 (37.8)                                 | 466 (44.9)                       |
| endocrine therapy | 3 ( 1.9)                   | 94 (30.6)                                       | 57 (16.1)                                       | 5 ( 2.3)                                  | 159 (15.3)                       |
| Targeted therapy  | 34 (21.3)                  | 70 (22.8)                                       | 180 (50.7)                                      | 130 (59.9)                                | 414 (39.8)                       |

**Table S6.** specification of BC treatment after the diagnosis of BM.

|                        | TNBC<br><i>n</i> = 81 N(%) | Luminal A<br>(HR+/HER2-)<br><i>n</i> = 151 N(%) | Luminal B<br>(HR+/HER2+)<br>N(%) <i>n</i> = 131 | HER2<br>(HR-/HER2+)<br><i>n</i> = 94 N(%) | Overall<br><i>n</i> = 457 * N(%) |
|------------------------|----------------------------|-------------------------------------------------|-------------------------------------------------|-------------------------------------------|----------------------------------|
| Anthracycline          | 12 (7.5)                   | 32 (10.4)                                       | 12 (3.4)                                        | 3 (1.4)                                   | 59 (5.7)                         |
| Taxane based           | 8 (5.0)                    | 16 (5.2)                                        | 20 (5.6)                                        | 13 (6.0)                                  | 57 (5.5)                         |
| Taxane + Anthracycline | 32 (20.0)                  | 43 (14.0)                                       | 39 (11.0)                                       | 25 (11.5)                                 | 139 (13.4)                       |
| Other chemotherapy     | 71 (44.4)                  | 52 (16.9)                                       | 47 (13.2)                                       | 41 (18.9)                                 | 211 (20.3)                       |
| Tamoxifen              |                            | 10 (3.3)                                        | 7 (2.0)                                         | 2 (0.9)                                   | 19 (1.8)                         |
| Aromatase Inhibitor    | 2 (1.3)                    | 53 (17.3)                                       | 30 (8.5)                                        | 2 (0.9)                                   | 87 (8.4)                         |
| GnRH-Analoga           |                            | 8 (2.6)                                         | 3 (0.3)                                         |                                           | 11 (1.1)                         |
| Other HT               | 1 (0.6)                    | 23 (7.5)                                        | 17 (4.8)                                        | 1 (0.5)                                   | 42 (4.0)                         |
| Trastuzumab            | 2 (1.3)                    | 6 (2.0)                                         | 64 (18)                                         | 44 (20.3)                                 | 116 (1.2)                        |
| Trastuzumab+Pertuzumab |                            | 2 (0.7)                                         | 15 (4.2)                                        | 7 (3.2)                                   | 24 (2.3)                         |
| Lapatinib              | 1 (0.6)                    | 6 (2.0)                                         | 43 (12.1)                                       | 38 (17.5)                                 | 88 (8.5)                         |
| T-DM1                  |                            | 3 (1.0)                                         | 29 (8.2)                                        | 26 (12.0)                                 | 58 (5.6)                         |
| Everolimus             |                            | 5 (1.6)                                         | 1 (0.3)                                         |                                           | 6 (0.6)                          |
| Bisphosphonates        | 8 (5.0)                    | 18 (5.9)                                        | 15 (4.2)                                        | 8 (3.7)                                   | 49 (4.7)                         |
| Denosumab              | 13 (8.1)                   | 16 (5.2)                                        | 9 (2.5)                                         | 3 (1.4)                                   | 41 (3.9)                         |
| Bevacizumab            | 10 (6.3)                   | 14 (4.6)                                        | 2 (0.6)                                         | 3 (1.4)                                   | 29 (2.8)                         |

---

|       |         |         |         |
|-------|---------|---------|---------|
| Other | 2 (0.6) | 1 (0.5) | 3 (0.3) |
|-------|---------|---------|---------|

---
